# Supplementary material for: Subassemblies and Asymmetry in Assembly of Herpes Simplex Virus Procapsid
Source: PubMed Central journal article supplement — mBio. 2015 Oct 6;6(5):e01525-15. doi: 10.1128/mBio.01525-15 (PMC4611051; doi:10.1128/mbio.01525-15), 2015-10-06

Supplemental Figure S1

Cryo-electron micrograph of purified HSV-1 procapsids. Red arrows indicate procapsids deemed to be significantly distorted. Black arrows indicate procapsids deemed not to be distorted, according to visual assessment. The particles are 1250Å in diameter. Inset at top right is a schematic map of the procapsid proteins. UL19 is the major capsid protein; UL38 and UL18 are the triplex proteins; UL6 is the connector; UL26.5 and UL26 are the scaffolding proteins. VP24 (small yellow oval) is the protease.

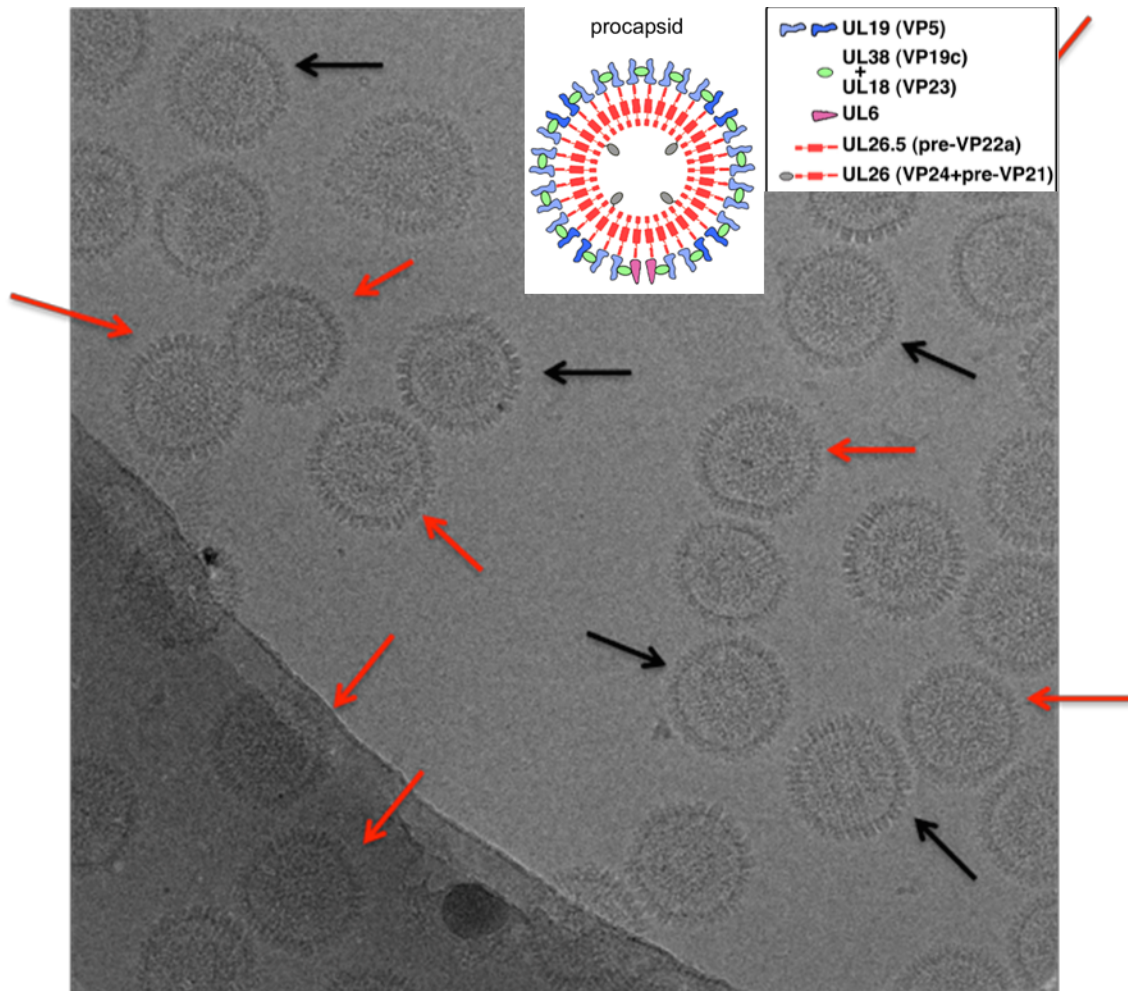

Supplement: mbo005152496sf1.pdf [file mbo005152496sf1.pdf]
