# Supplementary material for: Subassemblies and Asymmetry in Assembly of Herpes Simplex Virus Procapsid
Source: PubMed Central journal article supplement — mBio. 2015 Oct 6;6(5):e01525-15. doi: 10.1128/mBio.01525-15 (PMC4611051; doi:10.1128/mbio.01525-15), 2015-10-06

Supplemental Figure S2

Superposition of the four triplexes-MCP units (each colored red, blue, yellow and orange) in the procapsid map (left) and capsid map (right).

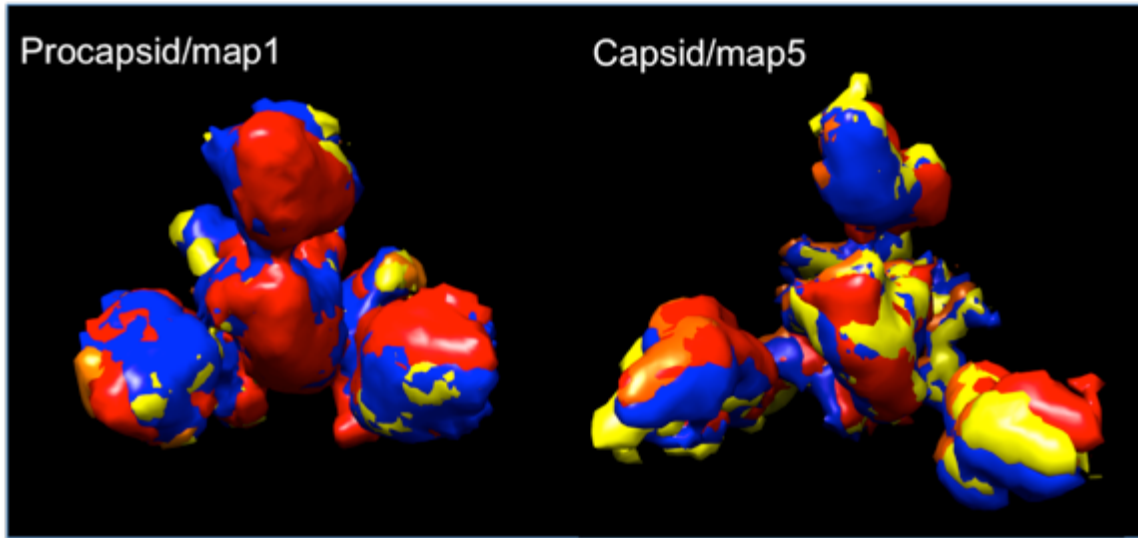

Supplement: mbo005152496sf2.pdf [file mbo005152496sf2.pdf]
