# Supplementary material for: Subassemblies and Asymmetry in Assembly of Herpes Simplex Virus Procapsid
Source: PubMed Central journal article supplement — mBio. 2015 Oct 6;6(5):e01525-15. doi: 10.1128/mBio.01525-15 (PMC4611051; doi:10.1128/mbio.01525-15), 2015-10-06

Supplemental Figure 3

Alternative nucleation complexes. A - 5-fold ring of Ta protomers; B - 5-fold ring of Ta protomers, each lacking an MCP subunit, surrounding a 12-fold ring of portal protein.

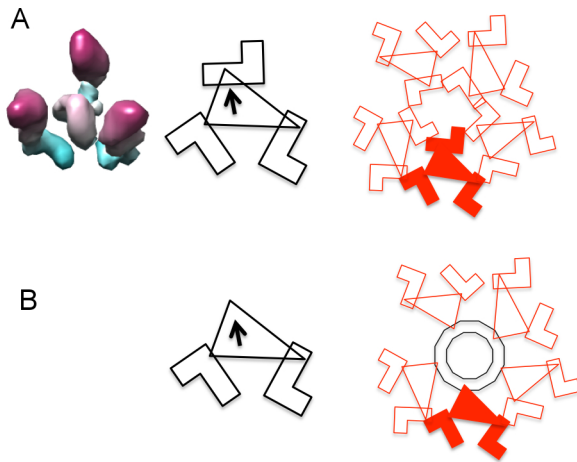

Supplement: mbo005152496sf3.pdf [file mbo005152496sf3.pdf]
